# Supplementary material for: Histological Examination of Horse Chestnut Infection by Pseudomonas syringae pv. aesculi and Non-Destructive Heat Treatment to Stop Disease Progression
Source: PubMed Central journal article supplement (PMC3392261; doi:10.1371/journal.pone.0039604), 2012-07-09
Supplement: pone.0039604.s002.pdf [file pone.0039604.s002.pdf]

## Supplemental figure S2

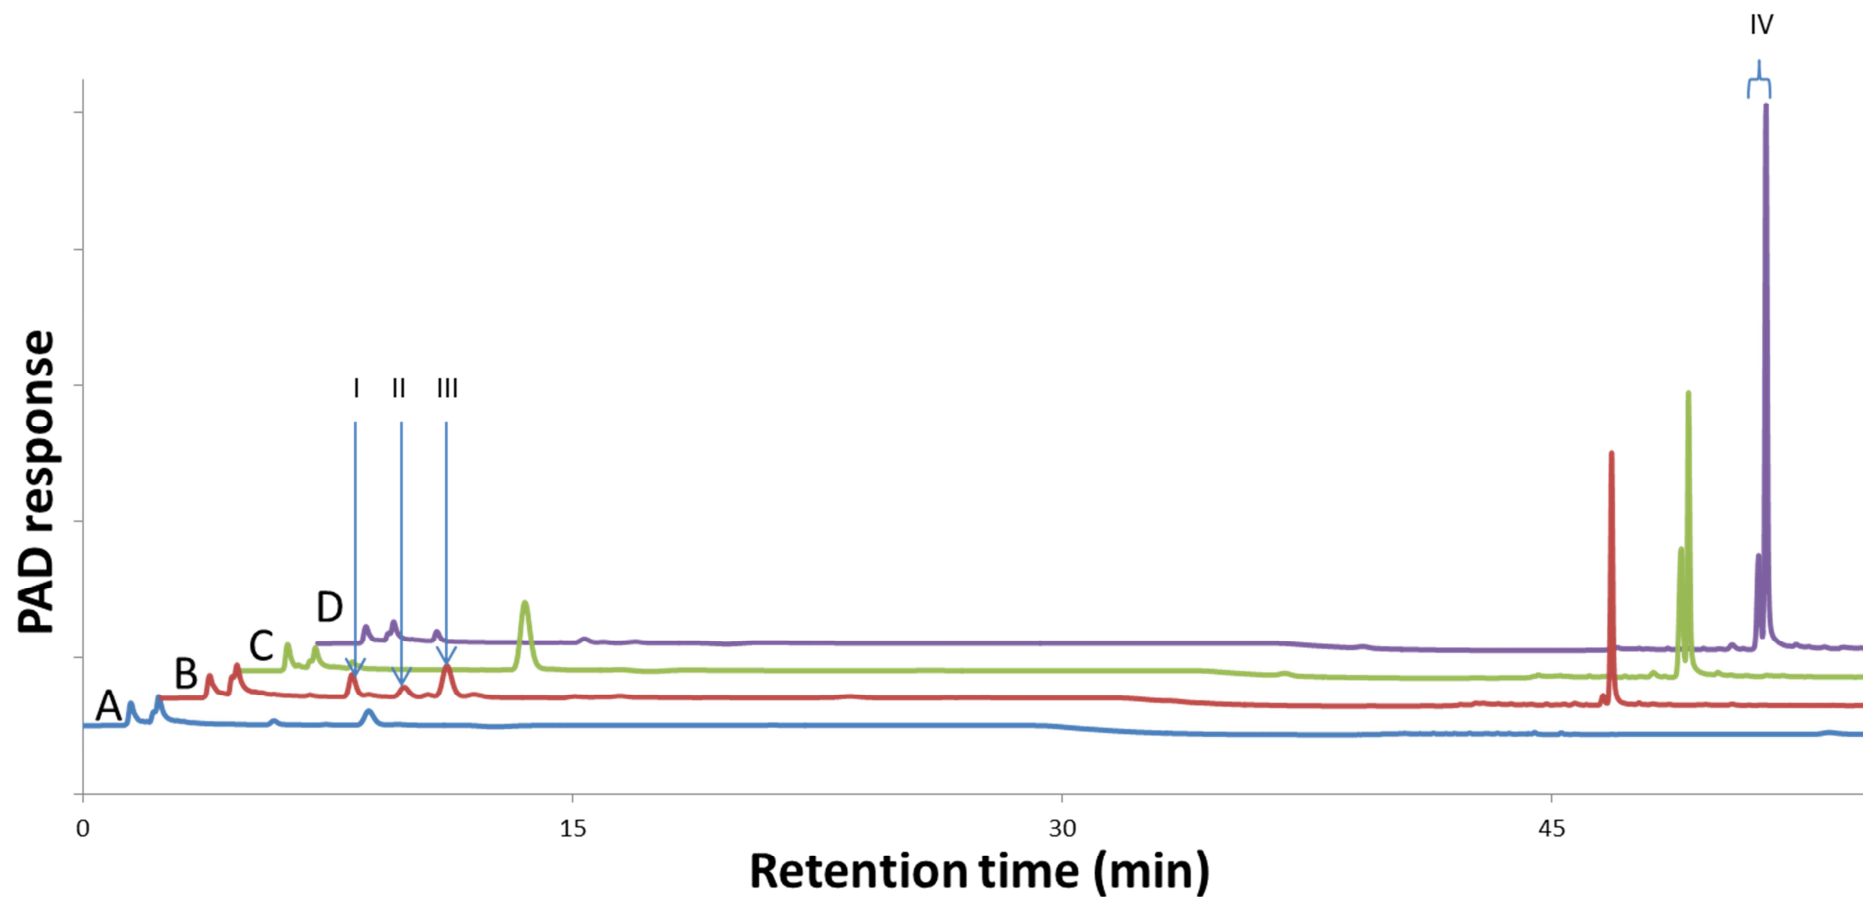

High performance anion exchange chromatography of acid hydrolysed extracellular polysaccharide of *Pseudomonas syringae* pv. *aesculi* PD4818 cultivated without (A) and with salt stress (B) and acid hydrolysed alginate from *Laminaria hyperborea* (C) and *Macrocystis pyrifera* (D). Each subsequent plot has been shifted 2.4 minutes for clarity. The marked peaks represent: **I**, Rhamnose; **II**, Unidentified compound; **III**, Glucose; **IV**, Degradation pattern of alginate (guluronic acid and mannuronic acid).
